# Supplementary material for: A deep learning-based framework for battery reusability verification: one-step state-of-health estimation of pack and constituent modules using a generative algorithm and graphical representation
Source: Royal Society of Chemistry journal article supplement (doi:10.1039/d3ta03603k), 2023-01-01
Supplement: d3ta03603k1.pdf [file d3ta03603k1.pdf]

### Supplementary Note 1. The methodologies for SoH calculation and identifying the tendency of SoH distribution

To overcome the limitation of difficulty in measuring the capacity of internal modules, which are used as labels for training DeepSUGAR, a new method of capacity calculation in State-of-Health (SoH) formula (Eqn. 1) was proposed where  $Q_{max}$  is the available maximum charge and  $C_r$  is the rated capacity.

$$SOH = 100 \frac{Q_{max}}{C_r} \quad (\text{Eqn. 1})$$

Since the setup of the cycler, charging condition of constant power with 289.3W to 57.8V and discharging condition of constant current with 0.5C to 42.0V, is based on the pack, it is possible to move on to the next cycle even if some internal modules have not yet reached voltage 3.0V. Therefore, based on the coulomb counting method, the capacity was calculated by accumulating current until the voltage reached 43.4V, 3.1V as a threshold for the pack and its individual modules, respectively. SoH was calculated based on the current accumulation values of the first cycle and current cycle.

To identify the tendency of SoH distribution of fourteen modules more clearly, the linear regressor was used. All the parameters of LinearRegression() were set as default<sup>1</sup>.

### Supplementary Note 2. The methodologies for Temperature distribution regression in Fig. 2d

In our experimental setup, four temperatures at 2<sup>nd</sup>, 6<sup>th</sup>, 9<sup>th</sup>, and 13<sup>th</sup> modules were collected by battery management system. Based on four temperatures, the temperature distribution inside the pack was predicted using Gaussian Process Regressor (GPR) to analyze the cause of SoH distribution of modules inside the pack. The parameters of GPR were set 'kernel' as 1\*RBF(length\_scale = 1.0, length\_scale\_bounds=(1e-2, 1e2)), 'n\_restarts\_optimizer' as 9, 'random\_state' as 0, and other parameters as default<sup>1</sup>.

### Supplementary Note 3. Conventional machine learning framework for Li-ion battery SoH estimation

This section provides a detailed description of the working process of the conventional machine learning frameworks.

#### 1.1 Data preprocessing and feature extraction

Battery degradation is a complex phenomenon resulting from various mechanisms, such as SEI layer formation and Li-plating, occurring inside the battery cell. Estimating battery health from these mechanisms is limited as they are difficult to detect without battery disassembly. Hence, a phenomenological approach based on measurable parameters, such as voltage, capacity, and temperature, is required. Previous research have noted distinct patterns in cycling profiles with battery aging, such as a shift the voltage profile due to the decrease time required

for one cycle and the peak of the capacity curve shifts as cycling progresses, as shown in Fig. 2a. To compare the performance of DeepSUGAR, we analyzed the salient patterns of cycling curves resulting from battery aging.

In the construction of conventional frameworks, we extracted 49 features as battery health indicators, as presented in Table S4. These features are classified into five groups: voltage-related, temperature-related, capacity-related, current-related, and IC-related features. Although some of the extracted features are closely associated with battery aging, others may also be negligible or have no relevance to SoH. Including irrelevant features can lead to an increase in computational cost and potential overfitting problems, the selection of optimal feature set is imperative.

## 1.2 Feature selection

In this paper, five feature selection methods are concerned: ElasticNet, PCA, Filter method, Lasso, and Feature Selector. The detailed model parameters are listed in Table S3, and the selected features are listed in Table S5. The Decision Tree (DT) regressor is used as the basic SoH estimation model to find out the optimal feature set. The parameter was set ‘criterion’ as ‘squared\_error’, ‘splitter’ as ‘best’, ‘max\_depth’ as ‘None’, ‘min\_samples\_split’ as ‘2’, ‘min\_samples\_leaf’ as ‘1’, ‘min\_weight\_fraction\_leaf’ as ‘0.0’, ‘max\_features’ as ‘None’, ‘random\_state’ as ‘None’, ‘max\_leaf\_nodes’ as ‘None’, ‘min\_impurity\_decrease’ = ‘0.0’, and ‘ccp\_alpha’ = ‘0.0’<sup>1</sup>. As a result, the feature set which was selected equally by ElasticNet and Lasso has the best performance, 0.004925 of RMSE.

## 1.3 Compared SoH estimation performance with DeepSUGAR

In this section, the authors compare the performance of four machine learning models for estimating SoH, GPR, NuSVR, RF, and KNN, using a 6-feature set that was selected equally by ElasticNet and Lasso. The model parameters are provided in Table S11<sup>1</sup>.

The trained models were evaluated by comparing their performance degradation with DeepSUGAR by applying the trained and validated models using pack cycling data to module cycling data (Table S12).

### **Supplementary Note 4. Data volume utilized for training DeepSUGAR.**

In training DeepSUGAR for state-of-health estimation, we utilized cycling data from a 14S7P pack. The data was collected over 300 cycles augmented by random noise within a range of 0.01, 1% of the scaled voltage, current, and capacity profiles from 0 to 1. Of the total 1750 battery pack cycling profiles, the CNN model in DeepSUGAR was trained using 70% randomly extracted and validated using 70% of the unused profiles. The remaining data was used to test the model performance. Furthermore, the applicability of the model, trained using pack cycling data, to fourteen internal module data was evaluated with 2450 points that were neither used in training nor validation.

**Supplementary Fig. 1. The capacity degradation during the cycling test. (A) The capacity for each cycle under discharging cutoff conditions (3.0V). (B) The calculated capacity for each cycle reaching 3.1V to encompass the range necessary to account for the uneven discharging process within the battery pack. These values were utilized to calculate SoH.**

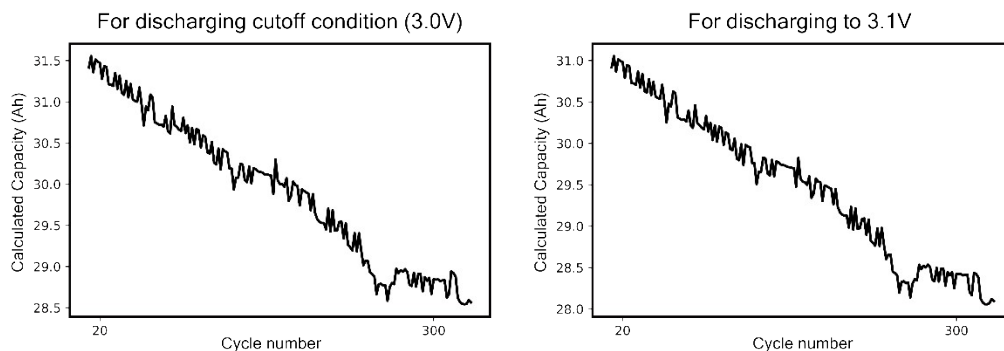

**Supplementary Fig. 2. The scaled SoH distribution of internal modules over 300 cycles. Observed values are represented by the red line and the trend predicted by linear regression by translucent red line.**

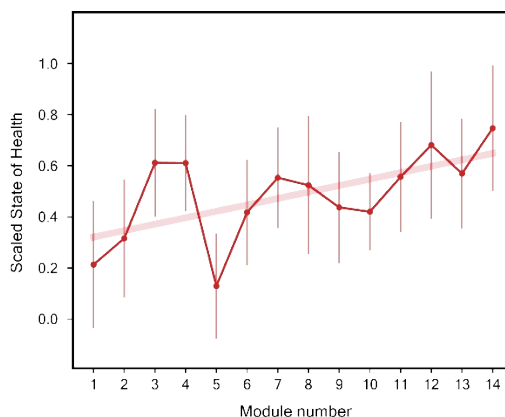

**Supplementary Fig. 3. The convolutional neural network for SoH estimation. (A) Model summary of the CNN architecture. (B) Key codes to construct CNN model. (C) Training and validation loss over 50 epochs obtained by training the CNN regression model.**

**a.**

| Layer type   | Output Shape       | Parameters # |
|--------------|--------------------|--------------|
| Conv2D       | (None, 256, 3, 32) | 160          |
| Conv2D       | (None, 256, 3, 64) | 8256         |
| MaxPooling2D | (None, 255, 2, 64) | 0            |
| Flatten      | (None, 32640)      | 0            |
| Dense        | (None, 64)         | 2089024      |
| Dense        | (None, 1)          | 65           |

**b.**

```

model_cnn = Sequential()
model_cnn.add(Conv2D(32, kernel_size = (2,2), strides = (1,1),
padding = 'same', activation = 'relu', input_shape = input_shape))
model_cnn.add(Conv2D(64, kernel_size = (2,2), strides = (1,1),
padding = 'same', activation = 'relu'))
model_cnn.add(MaxPooling2D(pool_size = (2,2), strides = (1,1)))
model_cnn.add(Flatten())
model_cnn.add(Dense(64,activation = 'relu'))
model_cnn.add(Dense(1))
model_cnn.summary()
    
```

**c.**

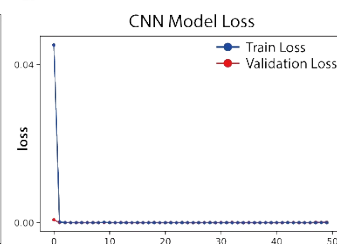

**Supplementary Fig. 4. (A) The error distribution plot of CNN framework trained and validated with pack cycling data. (B) The error distribution plot of CNN framework applied to module cycling data.**

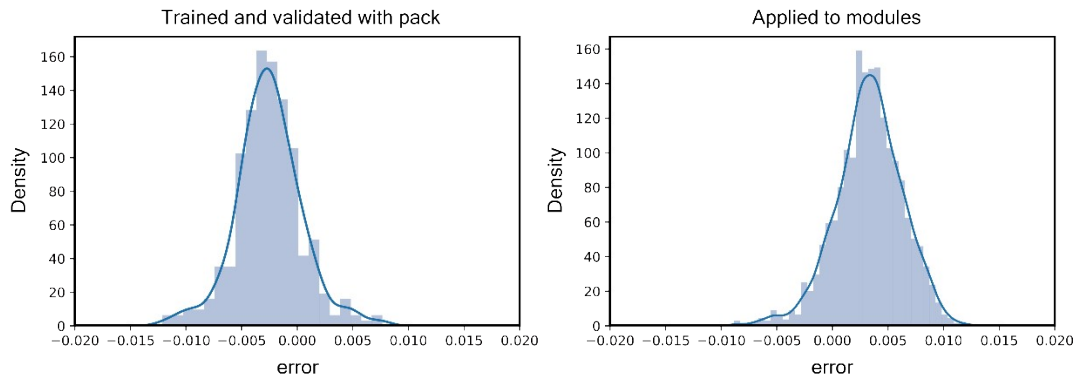

**Supplementary Fig. 5. Comparison of SoH estimation performance between DeepSUGAR and conventional frameworks in terms of the mean RMSE of 10 iterations by varying the training-test ratio to 9:1, 8:2, 7:3, and 6:4. The RMSE values for each case are listed in Table. S17-S18.**

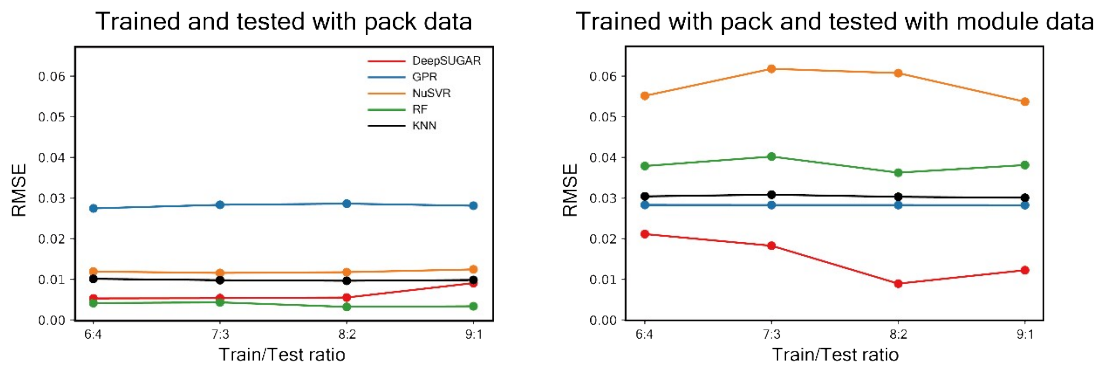

**Supplementary Fig. 6. The conditional deep convolutional generative adversarial networks for restoring cycling profiles of fourteen individual modules. (A) Model summary of generator in cDCGAN. (B) Key codes to construct generator in cDCGAN. (C) Model summary of discriminator in cDCGAN. (D) Key codes to construct discriminator in cDCGAN.**

**a.**

| Layer type         | Output Shape        | Parameters # |
|--------------------|---------------------|--------------|
| Dense              | (None, 57344)       | 5791744      |
| Reshape            | (None, 7, 32, 256)  | 0            |
| Conv2DTranspose    | (None, 14, 64, 128) | 295040       |
| BatchNormalization | (None, 14, 64, 128) | 512          |
| LeakyReLU          | (None, 14, 64, 128) | 0            |
| Conv2DTranspose    | (None, 14, 128, 64) | 73792        |
| BatchNormalization | (None, 14, 128, 64) | 256          |
| LeakyReLU          | (None, 14, 128, 64) | 0            |
| Conv2DTranspose    | (None, 14, 256, 3)  | 1731         |
| Activation         | (None, 14, 256, 3)  | 0            |

**b.**

```

model_gen = Sequential()
model_gen.add(Dense(256*32*7, input_dim = z_dim))
model_gen.add(Reshape((7,32,256)))
model_gen.add(Conv2DTranspose(128, kernel_size = 3, strides = (2,2), padding = 'same'))
model_gen.add(BatchNormalization(momentum=0.8))
model_gen.add(LeakyReLU(alpha=0.2))
model_gen.add(Conv2DTranspose(64, kernel_size = 3, strides = (1,2), padding = 'same'))
model_gen.add(BatchNormalization(momentum=0.8))
model_gen.add(LeakyReLU(alpha=0.2))
model_gen.add(Conv2DTranspose(3, kernel_size = 3, strides = (1,2), padding = 'same'))
model_gen.add(Activation('tanh'))
model_gen.summary()

```

**c.**

| Layer type | Output Shape       | Parameters # |
|------------|--------------------|--------------|
| Conv2D     | (None, 7, 128, 64) | 2368         |
| LeakyReLU  | (None, 7, 128, 64) | 0            |
| Conv2D     | (None, 4, 64, 64)  | 36928        |
| LeakyReLU  | (None, 4, 64, 64)  | 0            |
| Conv2D     | (None, 2, 32, 128) | 73856        |
| LeakyReLU  | (None, 2, 32, 128) | 0            |
| Flatten    | (None, 8192)       | 0            |
| Dense      | (None, 256)        | 2097408      |
| LeakyReLU  | (None, 256)        | 0            |
| Dropout    | (None, 256)        | 0            |
| Dense      | (None, 1)          | 257          |

**d.**

```

model_dis = Sequential()
model_dis.add(Conv2D(64, kernel_size = 3, strides = 2,
                    input_shape = (img_shape[0], img_shape[1], img_shape[2]+1), padding = 'same'))
model_dis.add(LeakyReLU(alpha=0.2))
model_dis.add(Conv2D(64, kernel_size = 3, strides = 2, padding = 'same'))
model_dis.add(LeakyReLU(alpha=0.2))
model_dis.add(Conv2D(128, kernel_size = 3, strides = 2, padding = 'same'))
model_dis.add(LeakyReLU(alpha=0.2))
model_dis.add(Flatten())
model_dis.add(Dense(256))
model_dis.add(LeakyReLU(alpha=0.2))
model_dis.add(Dropout(0.5))
model_dis.add(Dense(1, activation = 'sigmoid'))
model_dis.summary()

```



**Supplementary Fig. 8. The error distribution plot of interpolated cDCGAN.**

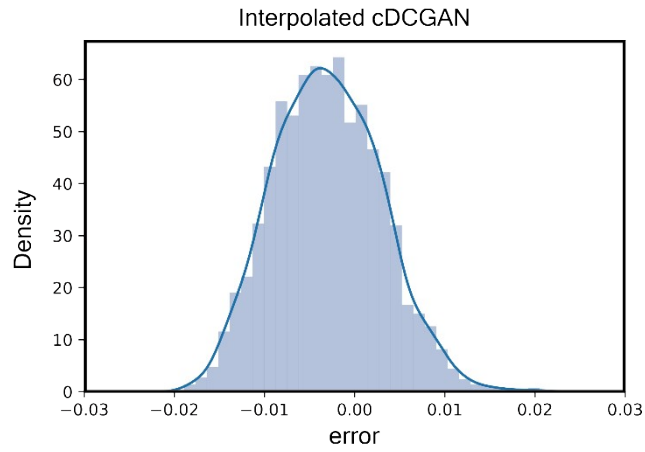

**Supplementary Fig. 9. Distribution of processing cost for (a) a conventional methodology and (b) DeepSUGAR approach.**

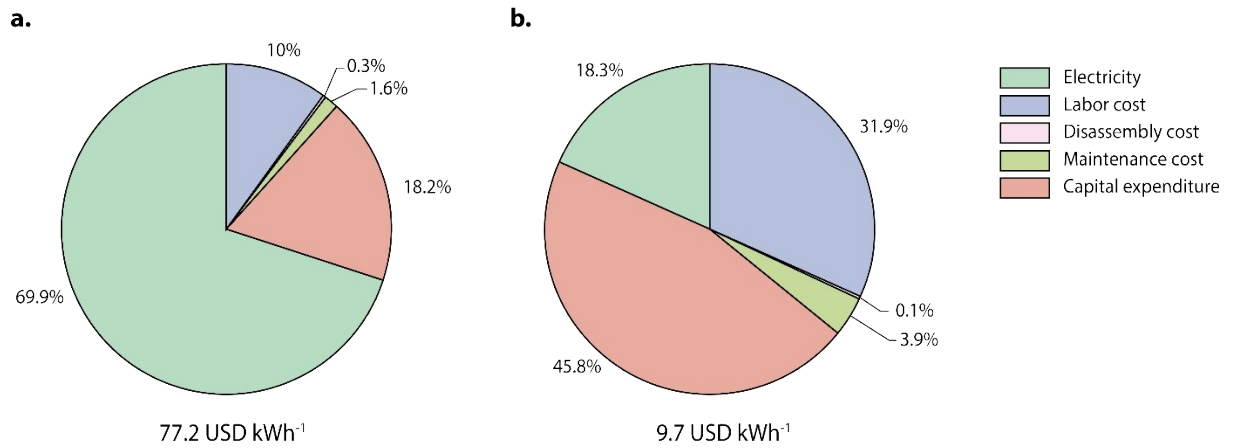

**Supplementary Fig. 10. Comparison of capital and operating expenditure between the base and DeepSUGAR.**

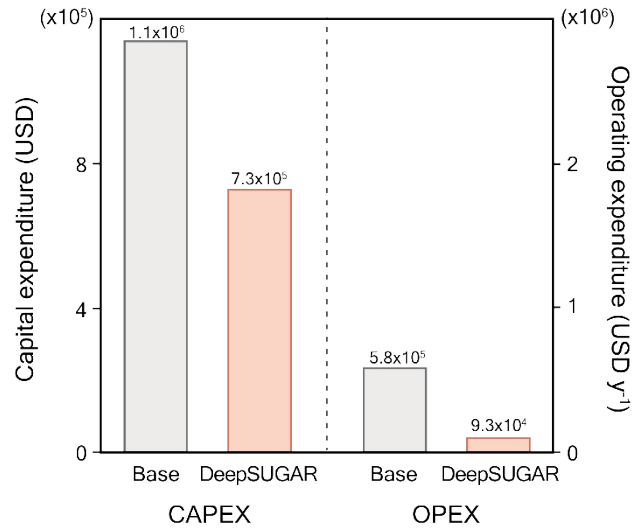

**Supplementary Fig. 11. Result of sensitivity analysis in terms of processing cost in USD kWh<sup>-1</sup> for (a) base and (b) DeepSUGAR.**

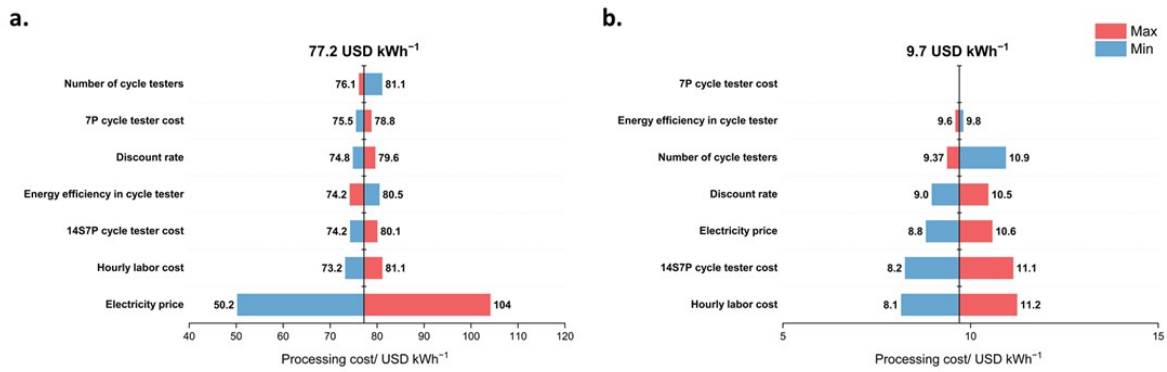



**Supplementary Fig. 12. Prices of battery cycle testers in USD per channel along with respective maximum voltage and current.**

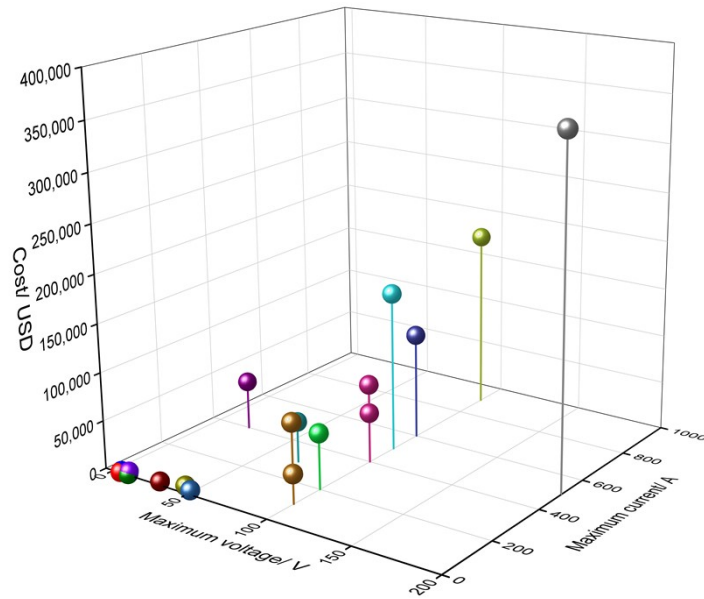

**Supplementary Table 1. The SoH estimation performance of the trained and validated CNN model with pack cycling data over 10 iterations.**

|               | <b>R-squared</b> | <b>RMSE</b> | <b>MSE</b> | <b>MAE</b> | <b>MAPE</b> |
|---------------|------------------|-------------|------------|------------|-------------|
| <b>Try 1</b>  | 0.962797         | 0.005524    | 0.000031   | 0.004185   | 0.004383    |
| <b>Try 2</b>  | 0.966258         | 0.005261    | 0.000028   | 0.004321   | 0.004553    |
| <b>Try 3</b>  | 0.964638         | 0.005386    | 0.000029   | 0.004145   | 0.00434     |
| <b>Try 4</b>  | 0.967547         | 0.00516     | 0.000027   | 0.003918   | 0.004111    |
| <b>Try 5</b>  | 0.968689         | 0.005068    | 0.000026   | 0.003827   | 0.00401     |
| <b>Try 6</b>  | 0.964438         | 0.005401    | 0.000029   | 0.004053   | 0.004237    |
| <b>Try 7</b>  | 0.967047         | 0.005199    | 0.000027   | 0.003903   | 0.004081    |
| <b>Try 8</b>  | 0.962936         | 0.005514    | 0.00003    | 0.004214   | 0.004416    |
| <b>Try 9</b>  | 0.965216         | 0.005342    | 0.000029   | 0.004594   | 0.004841    |
| <b>Try 10</b> | 0.966422         | 0.005248    | 0.000028   | 0.004027   | 0.004244    |
| <b>Mean</b>   | 0.965599         | 0.00531     | 2.84E-05   | 0.004119   | 0.004322    |

**Supplementary Table 2. The SoH estimation performance of CNN model applied to module cycling data over 10 iterations.**

|               | <b>R-squared</b> | <b>RMSE</b> | <b>MSE</b> | <b>MAE</b> | <b>MAPE</b> |
|---------------|------------------|-------------|------------|------------|-------------|
| <b>Try 1</b>  | 0.950013         | 0.006315    | 0.00004    | 0.005474   | 0.005729    |
| <b>Try 2</b>  | 0.933922         | 0.007261    | 0.000053   | 0.006569   | 0.006881    |
| <b>Try 3</b>  | 0.923709         | 0.007802    | 0.000061   | 0.007122   | 0.007489    |
| <b>Try 4</b>  | 0.949809         | 0.006328    | 0.00004    | 0.005581   | 0.005847    |
| <b>Try 5</b>  | 0.927444         | 0.007609    | 0.000058   | 0.006831   | 0.007158    |
| <b>Try 6</b>  | 0.90361          | 0.00877     | 0.000077   | 0.00805    | 0.008431    |
| <b>Try 7</b>  | 0.950491         | 0.006285    | 0.00004    | 0.005541   | 0.005808    |
| <b>Try 8</b>  | 0.935807         | 0.007157    | 0.000051   | 0.006533   | 0.006852    |
| <b>Try 9</b>  | 0.909534         | 0.008496    | 0.000072   | 0.00773    | 0.00809     |
| <b>Try 10</b> | 0.923515         | 0.007812    | 0.000061   | 0.007191   | 0.007536    |
| <b>Mean</b>   | 0.930785         | 0.0073835   | 0.0000553  | 0.0066622  | 0.0069821   |

**Supplementary Table 3. In conventional ML frameworks, model parameters to select significant battery health indicators<sup>1</sup>.**

| Model            | Model parameter                                                                                                                                                                                      |
|------------------|------------------------------------------------------------------------------------------------------------------------------------------------------------------------------------------------------|
| ElasticNet       | <i>alpha=0.9, l1_ratio=0.5, fit_intercept=True, precompute=False, max_iter=1000, copy_X=True, tol=0.0001, warm_start=False, positive=False, random_state=None, selection='cyclic'</i>                |
| PCA              | <i>cumulative explained_variance_ratio &gt; 0.82</i>                                                                                                                                                 |
| Filter method    | <i>variance threshold=0.05, correlation &gt; 0.70</i>                                                                                                                                                |
| Lasso            | <i>alpha = 0.7, fit_intercept = True, precompute = False, copy_x = True, max_iter = 1000, tol = 1e<sup>-4</sup>, warm_start = False, positive = False, random_state = None, selection = 'cyclic'</i> |
| Feature Selector | <i>correlation threshold=0.5</i>                                                                                                                                                                     |

**Supplementary Table 4. Extracted battery health indicators for estimating SoH with conventional ML models**

| Feature Type        | State     | No. | Description                                 |                             |
|---------------------|-----------|-----|---------------------------------------------|-----------------------------|
| Voltage related     | Charge    | F1  | Initial voltage value                       |                             |
|                     |           | F2  | Area of voltage profile                     |                             |
|                     |           | F3  | Final voltage value                         |                             |
|                     |           | F4  | Time at which the last voltage was measured |                             |
|                     |           | F5  | Area of 30 points in front                  |                             |
|                     |           | F6  | Slope of 30 points in front                 |                             |
|                     |           | F7  | Skewness of 30 points in front              |                             |
|                     |           | F8  | Kurtosis of 30 points in front              |                             |
|                     | Discharge | F9  | Initial voltage value                       |                             |
|                     |           | F10 | Area of voltage profile                     |                             |
|                     |           | F11 | Final voltage value                         |                             |
|                     |           | F12 | Time at which the last voltage was measured |                             |
|                     |           | F13 | Area of 30 points in front                  |                             |
|                     |           | F14 | Slope of 30 points in front                 |                             |
|                     |           | F15 | Skewness of 30 points in front              |                             |
|                     |           | F16 | Kurtosis of 30 points in front              |                             |
| Temperature related | Charge    | F17 | Initial Temperature value                   |                             |
|                     |           | F18 | Final temperature value                     |                             |
|                     |           | F19 | Area of temperature profile                 |                             |
|                     |           | F20 | Slope of temperature profile                |                             |
|                     |           | F21 | Area of 30 points in front                  |                             |
|                     |           | F22 | Slope of 30 points in front                 |                             |
|                     |           | F23 | Skewness of 30 points in front              |                             |
|                     |           | F24 | Kurtosis of 30 points in front              |                             |
|                     |           |     | F25                                         | Final temperature value     |
|                     |           |     | F26                                         | Area of temperature profile |

|                         |           |     |                                                 |
|-------------------------|-----------|-----|-------------------------------------------------|
|                         | Discharge | F27 | Slope of temperature profile                    |
|                         |           | F28 | Slope of 30 points in front                     |
|                         |           | F29 | Area of 30 points in front                      |
|                         |           | F30 | Skewness of 30 points in front                  |
|                         |           | F31 | Kurtosis of 30 points in front                  |
| <b>Capacity related</b> | Charge    | F32 | Initial capacity value                          |
|                         |           | F33 | Final capacity value                            |
|                         |           | F34 | Maximum capacity value                          |
|                         |           | F35 | Time at which the maximum capacity was measured |
|                         |           | F36 | Slope of 30 points in front                     |
|                         | Discharge | F37 | Time at which the minimum capacity was measured |
|                         |           | F38 | Slope of 30 points in front                     |
| <b>Current related</b>  | Charge    | F39 | Initial current value                           |
|                         |           | F40 | Final current value                             |
|                         |           | F41 | Area of current profile                         |
|                         |           | F42 | Slope of current profile                        |
|                         |           | F43 | Slope of 30 points in front                     |
| <b>IC related</b>       | Discharge | F44 | First peak value of IC profile                  |
|                         |           | F45 | Time at which the first peak was measured       |
|                         |           | F46 | Second peak value of IC profile                 |
|                         |           | F47 | Time at which the second peak was measured      |
|                         |           | F48 | Third peak value of IC profile                  |
|                         |           | F49 | Time at which the third peak was measured       |

**Supplementary Table 5. Battery health indicators selected by the models listed in Table. S3 and the mean SoH estimation performance of DecisionTreeRegressor over 10 iterations (STable.6-STable.10). The ElasticNet and Lasso algorithm select the same feature set.**

| <b>Model</b>            | <b>Selected features</b>                                     | <b>R-squared</b> | <b>RMSE</b> | <b>MSE</b> | <b>MAE</b> | <b>MAPE</b> |
|-------------------------|--------------------------------------------------------------|------------------|-------------|------------|------------|-------------|
| <b>Before Selection</b> | F1~F49                                                       | 0.953818         | 0.005209    | 3.49E-05   | 0.0033326  | 0.0034918   |
| <b>ElasticNet</b>       | F10, F33, F34, F44, F46, F48                                 | 0.964522         | 0.004925    | 2.68E-05   | 0.0029381  | 0.0030806   |
| <b>PCA</b>              | F3, F9, F11, F15, F16, F20, F49                              | 0.804319         | 0.012403    | 0.000156   | 0.0084431  | 0.0088301   |
| <b>Filter method</b>    | F1, F2, F9, F11, F23, F24, F32, F36, F45, F46, F47, F48, F49 | 0.945869         | 0.006426    | 4.18E-05   | 0.0046438  | 0.0048758   |
| <b>Lasso</b>            | F10, F33, F34, F44, F46, F48                                 | 0.964522         | 0.004925    | 2.68E-05   | 0.0029381  | 0.0030806   |
| <b>Feature Selector</b> | F1, F9, F11, F23, F24, F32, F46, F47, F48                    | 0.697145         | 0.015427    | 0.000243   | 0.0107437  | 0.0112388   |

**Supplementary Table 6. SoH estimation performances of DecisionTreeRegressor trained with full feature set before selection over 10 iterations. The mean performances are listed in Table S5.**

|               | <b>R-squared</b> | <b>RMSE</b> | <b>MSE</b> | <b>MAE</b> | <b>MAPE</b> |
|---------------|------------------|-------------|------------|------------|-------------|
| <b>Try 1</b>  | 0.976443         | 0.004548    | 0.000021   | 0.003519   | 0.003665    |
| <b>Try 2</b>  | 0.978001         | 0.004371    | 0.000019   | 0.003231   | 0.003374    |
| <b>Try 3</b>  | 0.968004         | 0.004968    | 0.000025   | 0.003187   | 0.003342    |
| <b>Try 4</b>  | 0.983722         | 0.003672    | 0.000013   | 0.002854   | 0.002952    |
| <b>Try 5</b>  | 0.982453         | 0.003696    | 0.000014   | 0.002681   | 0.002791    |
| <b>Try 6</b>  | 0.975477         | 0.003988    | 0.000016   | 0.002822   | 0.002956    |
| <b>Try 7</b>  | 0.972816         | 0.004816    | 0.000023   | 0.003551   | 0.003749    |
| <b>Try 8</b>  | 0.985615         | 0.003591    | 0.000013   | 0.002409   | 0.002528    |
| <b>Try 9</b>  | 0.96242          | 0.00506     | 0.000026   | 0.003374   | 0.003514    |
| <b>Try 10</b> | 0.753231         | 0.01338     | 0.000179   | 0.005698   | 0.006047    |
| <b>Mean</b>   | 0.953818         | 0.005209    | 3.49E-05   | 0.0033326  | 0.0034918   |

**Supplementary Table 7. SoH estimation performances of DecisionTreeRegressor trained with feature set selected by ElasticNet over 10 iterations. Lasso selected the same feature set with ElasticNet. The mean performances are listed in Table S5.**

|               | <b>R-squared</b> | <b>RMSE</b> | <b>MSE</b> | <b>MAE</b> | <b>MAPE</b> |
|---------------|------------------|-------------|------------|------------|-------------|
| <b>Try 1</b>  | 0.984963         | 0.003328    | 0.000011   | 0.002113   | 0.002219    |
| <b>Try 2</b>  | 0.984619         | 0.003563    | 0.000013   | 0.002506   | 0.002594    |
| <b>Try 3</b>  | 0.926778         | 0.007147    | 0.000051   | 0.003638   | 0.003848    |
| <b>Try 4</b>  | 0.986764         | 0.003334    | 0.000011   | 0.002378   | 0.002461    |
| <b>Try 5</b>  | 0.955209         | 0.005901    | 0.000035   | 0.002918   | 0.003069    |
| <b>Try 6</b>  | 0.976617         | 0.004074    | 0.000017   | 0.003061   | 0.003198    |
| <b>Try 7</b>  | 0.935037         | 0.007428    | 0.000055   | 0.003866   | 0.004074    |
| <b>Try 8</b>  | 0.972795         | 0.004417    | 0.00002    | 0.0032     | 0.003364    |
| <b>Try 9</b>  | 0.941637         | 0.006372    | 0.000041   | 0.00299    | 0.003157    |
| <b>Try 10</b> | 0.980804         | 0.003684    | 0.000014   | 0.002711   | 0.002822    |
| <b>Mean</b>   | 0.964522         | 0.004925    | 2.68E-05   | 0.0029381  | 0.0030806   |

**Supplementary Table 8. SoH estimation performances of DecisionTreeRegressor trained with feature set selected by PCA over 10 iterations. The mean performances are listed in Table S5.**

|               | <b>R-squared</b> | <b>RMSE</b> | <b>MSE</b> | <b>MAE</b> | <b>MAPE</b> |
|---------------|------------------|-------------|------------|------------|-------------|
| <b>Try 1</b>  | 0.809337         | 0.012709    | 0.000162   | 0.00855    | 0.008899    |
| <b>Try 2</b>  | 0.790563         | 0.012293    | 0.000151   | 0.007804   | 0.008173    |
| <b>Try 3</b>  | 0.808581         | 0.01296     | 0.000168   | 0.008841   | 0.00929     |
| <b>Try 4</b>  | 0.783039         | 0.013001    | 0.000169   | 0.009318   | 0.00981     |
| <b>Try 5</b>  | 0.867579         | 0.009965    | 0.000099   | 0.00673    | 0.007068    |
| <b>Try 6</b>  | 0.694078         | 0.015603    | 0.000243   | 0.010378   | 0.010825    |
| <b>Try 7</b>  | 0.811438         | 0.012068    | 0.000146   | 0.008443   | 0.008815    |
| <b>Try 8</b>  | 0.804356         | 0.012116    | 0.000147   | 0.008349   | 0.008677    |
| <b>Try 9</b>  | 0.866617         | 0.010545    | 0.000111   | 0.007656   | 0.008023    |
| <b>Try 10</b> | 0.807605         | 0.012767    | 0.000163   | 0.008362   | 0.008721    |
| <b>Mean</b>   | 0.804319         | 0.012403    | 0.000156   | 0.0084431  | 0.0088301   |

**Supplementary Table 9. SoH estimation performances of DecisionTreeRegressor trained with feature set selected by Filter method over 10 iterations. The mean performances are listed in Table S5.**

|               | <b>R-squared</b> | <b>RMSE</b> | <b>MSE</b> | <b>MAE</b> | <b>MAPE</b> |
|---------------|------------------|-------------|------------|------------|-------------|
| <b>Try 1</b>  | 0.950625         | 0.006174    | 0.000038   | 0.004104   | 0.0043      |
| <b>Try 2</b>  | 0.954042         | 0.006555    | 0.000043   | 0.004845   | 0.005063    |
| <b>Try 3</b>  | 0.921014         | 0.008213    | 0.000067   | 0.005325   | 0.005598    |
| <b>Try 4</b>  | 0.94959          | 0.00582     | 0.000034   | 0.004635   | 0.004829    |
| <b>Try 5</b>  | 0.958114         | 0.005573    | 0.000031   | 0.004351   | 0.004569    |
| <b>Try 6</b>  | 0.930362         | 0.007025    | 0.000049   | 0.005266   | 0.005573    |
| <b>Try 7</b>  | 0.948314         | 0.006421    | 0.000041   | 0.004347   | 0.004558    |
| <b>Try 8</b>  | 0.945552         | 0.005989    | 0.000036   | 0.004641   | 0.004898    |
| <b>Try 9</b>  | 0.934003         | 0.00708     | 0.00005    | 0.004984   | 0.005215    |
| <b>Try 10</b> | 0.967072         | 0.005407    | 0.000029   | 0.00394    | 0.004155    |
| <b>Mean</b>   | 0.945869         | 0.006426    | 4.18E-05   | 0.0046438  | 0.0048758   |

**Supplementary Table 10. SoH estimation performances of DecisionTreeRegressor trained with feature set selected by Feature Selector over 10 iterations. The mean performances are listed in Table S5.**

|               | <b>R-squared</b> | <b>RMSE</b> | <b>MSE</b> | <b>MAE</b> | <b>MAPE</b> |
|---------------|------------------|-------------|------------|------------|-------------|
| <b>Try 1</b>  | 0.732014         | 0.014281    | 0.000204   | 0.010536   | 0.011079    |
| <b>Try 2</b>  | 0.479841         | 0.019286    | 0.000372   | 0.014138   | 0.014773    |
| <b>Try 3</b>  | 0.655977         | 0.017221    | 0.000297   | 0.011627   | 0.012184    |
| <b>Try 4</b>  | 0.78068          | 0.01419     | 0.000201   | 0.010063   | 0.010496    |
| <b>Try 5</b>  | 0.643511         | 0.017843    | 0.000318   | 0.01051    | 0.011017    |
| <b>Try 6</b>  | 0.808868         | 0.0126      | 0.000159   | 0.009347   | 0.00969     |
| <b>Try 7</b>  | 0.812737         | 0.013181    | 0.000174   | 0.00884    | 0.009263    |
| <b>Try 8</b>  | 0.6357           | 0.01686     | 0.000284   | 0.01116    | 0.01165     |
| <b>Try 9</b>  | 0.750157         | 0.013425    | 0.00018    | 0.010355   | 0.010812    |
| <b>Try 10</b> | 0.671963         | 0.015378    | 0.000236   | 0.010861   | 0.011424    |
| <b>Mean</b>   | 0.697145         | 0.015427    | 0.000243   | 0.0107437  | 0.0112388   |

**Supplementary Table 11. In conventional ML frameworks, regression model parameters to estimate SoH<sup>1</sup>.**

| <b>Model</b> | <b>Model parameter</b>                                                                                                                                                                                                                                                                                                                         |
|--------------|------------------------------------------------------------------------------------------------------------------------------------------------------------------------------------------------------------------------------------------------------------------------------------------------------------------------------------------------|
| <b>GPR</b>   | <i>Kernel = 1.0*Matern(length_scale = 1.0, length_scale_bounds = (1e-1, 10.0), nu = 2.5), alpha = 0.1, optimizer = fmin_l_bfgs_b, n_restarts_optimizer = 10, normalize_y = True, copy_X_train = True, random_state = None</i>                                                                                                                  |
| <b>NuSVR</b> | <i>nu=0.5, C=1.0, kernel='rbf', degree=3, gamma='scale', coef0=0.0, shrinking=True, tol=0.001, cache_size=200, verbose=False, max_iter=-1</i>                                                                                                                                                                                                  |
| <b>RF</b>    | <i>n_estimators=100, *, criterion='squared_error', max_depth=None, min_samples_split=2, min_samples_leaf=1, min_weight_fraction_leaf =0.0, max_features=1.0, max_leaf_nodes=None, min_impurity_decrease=0.0, bootstrap=True, oob_score=False, n_jobs=None, random_state=None, verbose=0, warm_start=False, ccp_alpha=0.0, max_samples=None</i> |
| <b>KNN</b>   | <i>n_neighbors=10, *, weights='uniform', algorithm='auto', leaf_size=30, p=2, metric='manhattan', metric_params=None, n_jobs=None</i>                                                                                                                                                                                                          |

**Supplementary Table 12. The SoH estimation performances of DeepSUGAR, GPR, NuSVR, RF, and KNN with a novel feature set selected by ElasticNet. The train and validation with pack cycling data were evaluated over 10 iterations (Table S13-S16).**

| <b>Model</b>     | <b>Data</b>              | <b>R-squared</b> | <b>RMSE</b> | <b>MSE</b> | <b>MAE</b> | <b>MAPE</b> |
|------------------|--------------------------|------------------|-------------|------------|------------|-------------|
| <b>DeepSUGAR</b> | Train/Validate with pack | 0.965599         | 0.00531     | 2.84E-05   | 0.004119   | 0.004322    |
|                  | Applied to module        | 0.930785         | 0.0073835   | 0.0000553  | 0.0066622  | 0.0069821   |
|                  | PIPs                     | 3.60543          | 39.049      | 94.7183    | 61.7431    | 61.5479     |
| <b>GPR</b>       | Train/Validate with pack | -0.020942        | 0.027987    | 0.000785   | 0.0241441  | 0.0253725   |
|                  | Applied to module        | -0.000025        | 0.028247    | 0.000798   | 0.024454   | 0.025701    |
|                  | PIPs                     | 99.88062         | 0.929       | 1.65605    | 1.28354    | 1.29471     |
| <b>NuSVR</b>     | Train/Validate with pack | 0.8280557        | 0.011683    | 0.000138   | 0.0094284  | 0.0099374   |
|                  | Applied to module        | -4.57748         | 0.066709    | 0.060434   | 0.060434   | 0.06258     |
|                  | PIPs                     | 652.7986         | -470.992    | -43692.8   | -540.978   | -529.742    |
| <b>RF</b>        | Train/Validate with pack | 0.9754125        | 0.004106    | 1.82E-05   | 0.0024836  | 0.0026171   |
|                  | Applied to module        | -1.007911        | 0.040026    | 0.032545   | 0.032545   | 0.033476    |
|                  | PIPs                     | 203.3318         | 874.817     | 178719     | 1210.4     | 1179.13     |
| <b>KNN</b>       | Train/Validate with pack | 0.8687586        | 0.009993    | 0.000101   | 0.0078577  | 0.0082539   |
|                  | Applied to module        | -0.117051        | 0.029854    | 0.024672   | 0.024672   | 0.026257    |
|                  | PIPs                     | 113.4734         | 198.749     | 24327.7    | 213.985    | 218.116     |

**Supplementary Table 13. The SoH estimation performance of GPR with a novel feature set selected by ElasticNet from pack cycling data over 10 iterations. The mean performances are listed in Table S12.**

|               | <b>R-squared</b> | <b>RMSE</b> | <b>MSE</b> | <b>MAE</b> | <b>MAPE</b> |
|---------------|------------------|-------------|------------|------------|-------------|
| <b>Try 1</b>  | -0.002693        | 0.028275    | 0.000799   | 0.024682   | 0.025781    |
| <b>Try 2</b>  | 0.000521         | 0.028326    | 0.000802   | 0.024235   | 0.025314    |
| <b>Try 3</b>  | -0.040926        | 0.030257    | 0.000916   | 0.026876   | 0.02849     |
| <b>Try 4</b>  | 0.053652         | 0.026455    | 0.0007     | 0.021919   | 0.022957    |
| <b>Try 5</b>  | -0.143684        | 0.030045    | 0.000903   | 0.02629    | 0.02804     |
| <b>Try 6</b>  | 0.002341         | 0.027145    | 0.000737   | 0.022997   | 0.02433     |
| <b>Try 7</b>  | -0.022764        | 0.026907    | 0.000724   | 0.023764   | 0.024882    |
| <b>Try 8</b>  | -0.037233        | 0.027403    | 0.000751   | 0.023569   | 0.024543    |
| <b>Try 9</b>  | -0.033225        | 0.025779    | 0.000665   | 0.022047   | 0.022962    |
| <b>Try 10</b> | 0.014595         | 0.029273    | 0.000857   | 0.025062   | 0.026426    |
| <b>Mean</b>   | -0.0209416       | 0.027987    | 0.000785   | 0.0241441  | 0.0253725   |



**Supplementary Table 14. The SoH estimation performance of NuSVR with a novel feature set selected by ElasticNet from pack cycling data over 10 iterations. The mean performances are listed in Table S12.**

|               | <b>R-squared</b> | <b>RMSE</b> | <b>MSE</b> | <b>MAE</b> | <b>MAPE</b> |
|---------------|------------------|-------------|------------|------------|-------------|
| <b>Try 1</b>  | 0.856323         | 0.011031    | 0.000122   | 0.008766   | 0.009269    |
| <b>Try 2</b>  | 0.806079         | 0.011472    | 0.000132   | 0.00905    | 0.009481    |
| <b>Try 3</b>  | 0.869687         | 0.011668    | 0.000136   | 0.00959    | 0.01011     |
| <b>Try 4</b>  | 0.793776         | 0.012576    | 0.000158   | 0.010384   | 0.010904    |
| <b>Try 5</b>  | 0.771373         | 0.013044    | 0.00017    | 0.010611   | 0.011188    |
| <b>Try 6</b>  | 0.844073         | 0.011036    | 0.000122   | 0.008985   | 0.009534    |
| <b>Try 7</b>  | 0.868163         | 0.010098    | 0.000102   | 0.008141   | 0.008532    |
| <b>Try 8</b>  | 0.791506         | 0.012712    | 0.000162   | 0.010201   | 0.010825    |
| <b>Try 9</b>  | 0.811398         | 0.01256     | 0.000158   | 0.010147   | 0.010649    |
| <b>Try 10</b> | 0.868179         | 0.010634    | 0.000113   | 0.008409   | 0.008882    |
| <b>Mean</b>   | 0.8280557        | 0.011683    | 0.000138   | 0.0094284  | 0.0099374   |

**Supplementary Table 15. The SoH estimation performance of RF with a novel feature set selected by ElasticNet from pack cycling data over 10 iterations. The mean performances are listed in Table S12.**

|               | <b>R-squared</b> | <b>RMSE</b> | <b>MSE</b> | <b>MAE</b> | <b>MAPE</b> |
|---------------|------------------|-------------|------------|------------|-------------|
| <b>Try 1</b>  | 0.971077         | 0.004781    | 0.000023   | 0.002813   | 0.002973    |
| <b>Try 2</b>  | 0.992392         | 0.002684    | 0.000007   | 0.002071   | 0.002167    |
| <b>Try 3</b>  | 0.985465         | 0.003293    | 0.000011   | 0.002602   | 0.002712    |
| <b>Try 4</b>  | 0.971966         | 0.00453     | 0.000021   | 0.002269   | 0.002416    |
| <b>Try 5</b>  | 0.976769         | 0.004099    | 0.000017   | 0.002599   | 0.002746    |
| <b>Try 6</b>  | 0.98825          | 0.002967    | 0.000009   | 0.002259   | 0.002389    |
| <b>Try 7</b>  | 0.939666         | 0.006677    | 0.000045   | 0.003063   | 0.003232    |
| <b>Try 8</b>  | 0.963466         | 0.004889    | 0.000024   | 0.002789   | 0.002946    |
| <b>Try 9</b>  | 0.985136         | 0.003364    | 0.000011   | 0.001939   | 0.002038    |
| <b>Try 10</b> | 0.979938         | 0.003777    | 0.000014   | 0.002432   | 0.002552    |
| <b>Mean</b>   | 0.9754125        | 0.004106    | 1.82E-05   | 0.0024836  | 0.0026171   |

**Supplementary Table 16.** The SoH estimation performance of KNN with a novel feature set selected by ElasticNet from pack cycling data over 10 iterations. The mean performances are listed in Table S12.

|               | <b>R-squared</b> | <b>RMSE</b> | <b>MSE</b> | <b>MAE</b> | <b>MAPE</b> |
|---------------|------------------|-------------|------------|------------|-------------|
| <b>Try 1</b>  | 0.83065          | 0.011128    | 0.000124   | 0.008845   | 0.009336    |
| <b>Try 2</b>  | 0.877697         | 0.009459    | 0.000089   | 0.007132   | 0.007436    |
| <b>Try 3</b>  | 0.902179         | 0.008707    | 0.000076   | 0.007115   | 0.007448    |
| <b>Try 4</b>  | 0.871336         | 0.010193    | 0.000104   | 0.008224   | 0.008643    |
| <b>Try 5</b>  | 0.887291         | 0.009348    | 0.000087   | 0.00736    | 0.007773    |
| <b>Try 6</b>  | 0.886631         | 0.009208    | 0.000085   | 0.007268   | 0.007682    |
| <b>Try 7</b>  | 0.840321         | 0.01119     | 0.000125   | 0.008521   | 0.008885    |
| <b>Try 8</b>  | 0.864671         | 0.009908    | 0.000098   | 0.007561   | 0.007871    |
| <b>Try 9</b>  | 0.887087         | 0.00951     | 0.00009    | 0.007428   | 0.007817    |
| <b>Try 10</b> | 0.839723         | 0.011279    | 0.000127   | 0.009123   | 0.009648    |
| <b>Mean</b>   | 0.8687586        | 0.009993    | 0.000101   | 0.0078577  | 0.0082539   |

**Supplementary Table 17.** The SoH estimation performance of DeepSUGAR and conventional frameworks in terms of RMSE over 10 iterations with the 6:4 of training-test data ratio. The mean performances are shown in Supplementary Fig. 5.

|               | <b>DeepSUGAR</b> | <b>GPR</b> | <b>KNN</b> | <b>NuSVR</b> | <b>RF</b> |
|---------------|------------------|------------|------------|--------------|-----------|
| <b>Try 1</b>  | 0.004931         | 0.029348   | 0.009072   | 0.012309     | 0.003795  |
| <b>Try 2</b>  | 0.00541          | 0.026447   | 0.010361   | 0.011252     | 0.003769  |
| <b>Try 3</b>  | 0.007417         | 0.028661   | 0.010552   | 0.011726     | 0.002253  |
| <b>Try 4</b>  | 0.004049         | 0.026681   | 0.009422   | 0.011648     | 0.006657  |
| <b>Try 5</b>  | 0.005094         | 0.027943   | 0.010452   | 0.012285     | 0.008774  |
| <b>Try 6</b>  | 0.004449         | 0.029504   | 0.011788   | 0.011743     | 0.003163  |
| <b>Try 7</b>  | 0.008342         | 0.030404   | 0.010278   | 0.013105     | 0.002979  |
| <b>Try 8</b>  | 0.004504         | 0.024537   | 0.010017   | 0.011238     | 0.00367   |
| <b>Try 9</b>  | 0.004519         | 0.026066   | 0.010321   | 0.011856     | 0.004037  |
| <b>Try 10</b> | 0.004313         | 0.024916   | 0.008826   | 0.011945     | 0.002415  |
| <b>Mean</b>   | 0.0053028        | 0.0274507  | 0.0101089  | 0.0119107    | 0.0041512 |

**Supplementary Table 18.** The SoH estimation performance of DeepSUGAR and conventional frameworks in terms of RMSE over 10 iterations with the 7:3 of training-test data ratio. The mean performances are shown in Supplementary Fig. 5.

|               | <b>DeepSUGAR</b> | <b>GPR</b> | <b>KNN</b> | <b>NuSVR</b> | <b>RF</b> |
|---------------|------------------|------------|------------|--------------|-----------|
| <b>Try 1</b>  | 0.004179         | 0.027406   | 0.008812   | 0.010886     | 0.002717  |
| <b>Try 2</b>  | 0.005041         | 0.028969   | 0.009021   | 0.011465     | 0.004254  |
| <b>Try 3</b>  | 0.005302         | 0.029627   | 0.010843   | 0.011091     | 0.004385  |
| <b>Try 4</b>  | 0.005704         | 0.028273   | 0.010922   | 0.01124      | 0.004221  |
| <b>Try 5</b>  | 0.008252         | 0.027617   | 0.009585   | 0.011055     | 0.007327  |
| <b>Try 6</b>  | 0.004887         | 0.02757    | 0.010116   | 0.012666     | 0.006305  |
| <b>Try 7</b>  | 0.005106         | 0.028441   | 0.008561   | 0.012682     | 0.00329   |
| <b>Try 8</b>  | 0.004298         | 0.029685   | 0.009165   | 0.010775     | 0.004027  |
| <b>Try 9</b>  | 0.00441          | 0.025782   | 0.010094   | 0.011747     | 0.003271  |
| <b>Try 10</b> | 0.006394         | 0.029889   | 0.010758   | 0.011945     | 0.003449  |
| <b>Mean</b>   | 0.0053573        | 0.0283259  | 0.0097877  | 0.0115552    | 0.0043246 |

**Supplementary Table 19.** The SoH estimation performance of DeepSUGAR and conventional frameworks in terms of RMSE over 10 iterations with the 8:2 of training-test data ratio. The mean performances are shown in Supplementary Fig. 5.

|               | <b>DeepSUGAR</b> | <b>GPR</b> | <b>KNN</b> | <b>NuSVR</b> | <b>RF</b> |
|---------------|------------------|------------|------------|--------------|-----------|
| <b>Try 1</b>  | 0.005613         | 0.025302   | 0.008301   | 0.009928     | 0.004169  |
| <b>Try 2</b>  | 0.005624         | 0.027367   | 0.009658   | 0.012501     | 0.003873  |
| <b>Try 3</b>  | 0.004353         | 0.028134   | 0.009633   | 0.011376     | 0.003278  |
| <b>Try 4</b>  | 0.004636         | 0.029148   | 0.009534   | 0.012723     | 0.003279  |
| <b>Try 5</b>  | 0.004924         | 0.029733   | 0.009211   | 0.013863     | 0.004201  |
| <b>Try 6</b>  | 0.01005          | 0.028555   | 0.010582   | 0.010329     | 0.001924  |
| <b>Try 7</b>  | 0.004617         | 0.032109   | 0.011133   | 0.011154     | 0.00372   |
| <b>Try 8</b>  | 0.006526         | 0.031119   | 0.008226   | 0.01292      | 0.00284   |
| <b>Try 9</b>  | 0.003819         | 0.02696    | 0.010949   | 0.010946     | 0.002096  |
| <b>Try 10</b> | 0.004995         | 0.027681   | 0.009057   | 0.011822     | 0.002751  |
| <b>Mean</b>   | 0.0055157        | 0.0286108  | 0.0096284  | 0.0117562    | 0.0032131 |

**Supplementary Table 20.** The SoH estimation performance of DeepSUGAR and conventional frameworks in terms of RMSE over 10 iterations with the 9:1 of training-test data ratio. The mean performances are shown in Supplementary Fig. 5.

|               | <b>DeepSUGAR</b> | <b>GPR</b> | <b>KNN</b> | <b>NuSVR</b> | <b>RF</b> |
|---------------|------------------|------------|------------|--------------|-----------|
| <b>Try 1</b>  | 0.006895         | 0.028918   | 0.00924    | 0.015077     | 0.002939  |
| <b>Try 2</b>  | 0.009219         | 0.027194   | 0.009132   | 0.010294     | 0.004817  |
| <b>Try 3</b>  | 0.004703         | 0.023364   | 0.008669   | 0.014035     | 0.002253  |
| <b>Try 4</b>  | 0.004772         | 0.02853    | 0.011522   | 0.010667     | 0.002483  |
| <b>Try 5</b>  | 0.005793         | 0.029291   | 0.008297   | 0.011522     | 0.002534  |
| <b>Try 6</b>  | 0.004986         | 0.026154   | 0.011771   | 0.012701     | 0.004326  |
| <b>Try 7</b>  | 0.005002         | 0.029035   | 0.007842   | 0.011232     | 0.004203  |
| <b>Try 8</b>  | 0.003744         | 0.026789   | 0.00908    | 0.011092     | 0.004636  |
| <b>Try 9</b>  | 0.007153         | 0.028999   | 0.009933   | 0.015141     | 0.003116  |
| <b>Try 10</b> | 0.038371         | 0.032772   | 0.012869   | 0.012565     | 0.002407  |
| <b>Mean</b>   | 0.0090638        | 0.0281046  | 0.0098355  | 0.0124326    | 0.0033714 |

**Supplementary Table 21.** The SoH estimation performance of DeepSUGAR and conventional frameworks to the module data in terms of RMSE over 10 iterations with the 6:4 of training-test data ratio. The mean performances are shown in Supplementary Fig. 5.

|               | <b>DeepSUGAR</b> | <b>GPR</b> | <b>KNN</b> | <b>NuSVR</b> | <b>RF</b> |
|---------------|------------------|------------|------------|--------------|-----------|
| <b>Try 1</b>  | 0.004927         | 0.02831    | 0.029867   | 0.036718     | 0.033571  |
| <b>Try 2</b>  | 0.011745         | 0.028299   | 0.032061   | 0.060335     | 0.046451  |
| <b>Try 3</b>  | 0.010743         | 0.02825    | 0.031976   | 0.051482     | 0.038167  |
| <b>Try 4</b>  | 0.010625         | 0.028374   | 0.0302     | 0.078772     | 0.04254   |
| <b>Try 5</b>  | 0.008476         | 0.028415   | 0.03058    | 0.0533       | 0.029966  |
| <b>Try 6</b>  | 0.129931         | 0.028247   | 0.03302    | 0.058248     | 0.034439  |
| <b>Try 7</b>  | 0.006358         | 0.028263   | 0.028976   | 0.051782     | 0.037662  |
| <b>Try 8</b>  | 0.011695         | 0.028303   | 0.02864    | 0.054958     | 0.035214  |
| <b>Try 9</b>  | 0.009904         | 0.028262   | 0.030278   | 0.050539     | 0.042935  |
| <b>Try 10</b> | 0.0069           | 0.028278   | 0.028508   | 0.05538      | 0.037835  |
| <b>Mean</b>   | 0.0211304        | 0.0283001  | 0.0304106  | 0.0551514    | 0.037878  |

**Supplementary Table 22.** The SoH estimation performance of DeepSUGAR and conventional frameworks to the module data in terms of RMSE over 10 iterations with the 7:3 of training-test data ratio. The mean performances are shown in Supplementary Fig. 5.

|               | <b>DeepSUGAR</b> | <b>GPR</b> | <b>KNN</b> | <b>NuSVR</b> | <b>RF</b> |
|---------------|------------------|------------|------------|--------------|-----------|
| <b>Try 1</b>  | 0.094251         | 0.028257   | 0.03311    | 0.063209     | 0.037473  |
| <b>Try 2</b>  | 0.007862         | 0.028262   | 0.032346   | 0.069352     | 0.040969  |
| <b>Try 3</b>  | 0.005809         | 0.028251   | 0.030288   | 0.062962     | 0.031306  |
| <b>Try 4</b>  | 0.012046         | 0.028303   | 0.029031   | 0.062231     | 0.047064  |
| <b>Try 5</b>  | 0.015864         | 0.028257   | 0.031023   | 0.065919     | 0.047523  |
| <b>Try 6</b>  | 0.008698         | 0.028255   | 0.032084   | 0.062181     | 0.036072  |
| <b>Try 7</b>  | 0.007999         | 0.028248   | 0.032716   | 0.076055     | 0.044348  |
| <b>Try 8</b>  | 0.010457         | 0.028345   | 0.029231   | 0.042248     | 0.045104  |
| <b>Try 9</b>  | 0.010954         | 0.02828    | 0.030503   | 0.067193     | 0.031388  |
| <b>Try 10</b> | 0.008645         | 0.028289   | 0.027949   | 0.046687     | 0.040797  |
| <b>Mean</b>   | 0.0182585        | 0.0282747  | 0.0308281  | 0.0618037    | 0.0402044 |

**Supplementary Table 23.** The SoH estimation performance of DeepSUGAR and conventional frameworks to the module data in terms of RMSE over 10 iterations with the 8:2 of training-test data ratio. The mean performances are shown in Supplementary Fig. 5.

|               | <b>DeepSUGAR</b> | <b>GPR</b> | <b>KNN</b> | <b>NuSVR</b> | <b>RF</b> |
|---------------|------------------|------------|------------|--------------|-----------|
| <b>Try 1</b>  | 0.010968         | 0.028264   | 0.028893   | 0.066909     | 0.037914  |
| <b>Try 2</b>  | 0.006756         | 0.028251   | 0.029853   | 0.059117     | 0.031052  |
| <b>Try 3</b>  | 0.009008         | 0.028291   | 0.032215   | 0.04724      | 0.045008  |
| <b>Try 4</b>  | 0.009606         | 0.028248   | 0.03306    | 0.073241     | 0.043706  |
| <b>Try 5</b>  | 0.01434          | 0.028247   | 0.030869   | 0.062554     | 0.031486  |
| <b>Try 6</b>  | 0.004982         | 0.028247   | 0.030312   | 0.076698     | 0.034529  |
| <b>Try 7</b>  | 0.010063         | 0.028313   | 0.031287   | 0.045938     | 0.03708   |
| <b>Try 8</b>  | 0.005182         | 0.028254   | 0.028515   | 0.061255     | 0.031294  |
| <b>Try 9</b>  | 0.008679         | 0.028308   | 0.02872    | 0.04623      | 0.032662  |
| <b>Try 10</b> | 0.009764         | 0.028299   | 0.029207   | 0.068254     | 0.037704  |
| <b>Mean</b>   | 0.0089348        | 0.0282722  | 0.0302931  | 0.0607436    | 0.0362435 |

**Supplementary Table 24.** The SoH estimation performance of DeepSUGAR and conventional frameworks to the module data in terms of RMSE over 10 iterations with the 9:1 of training-test data ratio. The mean performances are shown in Supplementary Fig. 5.

|               | <b>DeepSUGAR</b> | <b>GPR</b> | <b>KNN</b> | <b>NuSVR</b> | <b>RF</b> |
|---------------|------------------|------------|------------|--------------|-----------|
| <b>Try 1</b>  | 0.004571         | 0.02825    | 0.029842   | 0.041394     | 0.039589  |
| <b>Try 2</b>  | 0.007822         | 0.028252   | 0.029652   | 0.049059     | 0.036221  |
| <b>Try 3</b>  | 0.005407         | 0.028247   | 0.030151   | 0.046275     | 0.034885  |
| <b>Try 4</b>  | 0.010774         | 0.028259   | 0.029004   | 0.051005     | 0.03612   |
| <b>Try 5</b>  | 0.01683          | 0.028248   | 0.030015   | 0.055483     | 0.038893  |
| <b>Try 6</b>  | 0.036937         | 0.028251   | 0.030029   | 0.068411     | 0.040231  |
| <b>Try 7</b>  | 0.008221         | 0.028247   | 0.030175   | 0.067483     | 0.033962  |
| <b>Try 8</b>  | 0.008777         | 0.028248   | 0.031704   | 0.049089     | 0.036172  |
| <b>Try 9</b>  | 0.012908         | 0.02825    | 0.029337   | 0.06114      | 0.04608   |
| <b>Try 10</b> | 0.010093         | 0.028255   | 0.030738   | 0.04759      | 0.03903   |
| <b>Mean</b>   | 0.012234         | 0.0282507  | 0.0300647  | 0.0536929    | 0.0381183 |

**Supplementary Table 25.** The SoH estimation performance of interpolated cDCGAN over 10 iterations.

|               | <b>R-squared</b> | <b>RMSE</b> | <b>MSE</b> | <b>MAE</b> | <b>MAPE</b> |
|---------------|------------------|-------------|------------|------------|-------------|
| <b>Try 1</b>  | 0.896593         | 0.008527    | 0.006975   | 0.006975   | 0.007377    |
| <b>Try 2</b>  | 0.888394         | 0.008859    | 0.007452   | 0.007452   | 0.007843    |
| <b>Try 3</b>  | 0.938082         | 0.006598    | 0.005137   | 0.005137   | 0.005391    |
| <b>Try 4</b>  | 0.940197         | 0.006485    | 0.005205   | 0.005205   | 0.005469    |
| <b>Try 5</b>  | 0.862419         | 0.009836    | 0.008181   | 0.008181   | 0.008539    |
| <b>Try 6</b>  | 0.936525         | 0.006681    | 0.005439   | 0.005439   | 0.005695    |
| <b>Try 7</b>  | 0.893555         | 0.008652    | 0.006448   | 0.006448   | 0.006805    |
| <b>Try 8</b>  | 0.893605         | 0.008649    | 0.007189   | 0.007189   | 0.007574    |
| <b>Try 9</b>  | 0.871583         | 0.009503    | 0.007208   | 0.007208   | 0.007592    |
| <b>Try 10</b> | 0.858235         | 0.009984    | 0.008204   | 0.008204   | 0.008627    |
| <b>Mean</b>   | 0.897919         | 0.008377    | 0.006744   | 0.006744   | 0.007091    |

**Supplementary Table 26. Diagnosis processes and assumptions for time requirement.**

| <b>Level</b>  | <b>Procedure</b>                                                      | <b>Base</b> | <b>DeepSUGAR</b> | <b>Unit</b> |
|---------------|-----------------------------------------------------------------------|-------------|------------------|-------------|
| <b>Pack</b>   | <b>Inspection &amp; handling</b>                                      | 5           | 5                | min         |
|               | <b>Connection of the electrical test equipment</b>                    | 5           | 5                |             |
|               | <b>Disconnection from electrical test equipment</b>                   | 5           | 5                |             |
|               | <b>Final inspection</b>                                               | 5           | 5                |             |
|               | <b>Initial voltage set &amp; balance<br/>Battery characterization</b> | 420         | 420              |             |
| <b>Module</b> | <b>Disassembly</b>                                                    | 10          | -                |             |
|               | <b>Inspection &amp; handling</b>                                      | 5           | -                |             |
|               | <b>Connection of the electrical test equipment</b>                    | 5           | -                |             |
|               | <b>Disconnection from electrical test equipment</b>                   | 5           | -                |             |
|               | <b>Final inspection</b>                                               | 5           | -                |             |
|               | <b>Initial voltage set &amp; balance<br/>Battery characterization</b> | 420         | -                |             |

**Supplementary Table 27. Detailed results of comparison between the conventional and proposed processing methods.**

| <b>Indicator</b>                       | <b>Base</b> | <b>DeepSUGAR</b> | <b>Unit</b>                           |
|----------------------------------------|-------------|------------------|---------------------------------------|
| <b>Annual processing capacity</b>      | 9,479       | 19,173           | kWh y <sup>-1</sup>                   |
| <b>Annual power consumption</b>        | 5,326,588   | 355,106          | kWh y <sup>-1</sup>                   |
| <b><sup>a</sup>CAPEX</b>               | 1,135,889   | 725,222          | USD                                   |
| <b><sup>b</sup>OPEX</b>                | 584,701     | 93,436           | USD y <sup>-1</sup>                   |
| <b>Processing cost</b>                 | 77.2        | 9.7              | USD kWh <sup>-1</sup>                 |
| <b>Annual carbon dioxide emissions</b> | 2,530,129   | 168,675          | kgCO <sub>2</sub> -eq y <sup>-1</sup> |

<sup>a</sup>CAPEX: Capital expenditure

<sup>b</sup>OPEX: Operating expenditure

**Supplementary Table 28. Information about labor cost and electricity price for countries in the case study and the result of economic performance.**

| Information                    | Unit                  | <sup>a</sup> KOR | <sup>b</sup> CHN | <sup>c</sup> USA | <sup>d</sup> DEU | <sup>e</sup> FRA | <sup>f</sup> GBR | <sup>g</sup> CAN | Reference              |
|--------------------------------|-----------------------|------------------|------------------|------------------|------------------|------------------|------------------|------------------|------------------------|
| <sup>1</sup> Labor cost        | USD h <sup>-1</sup>   | 16.32            | 6.50             | 24.82            | 47.63            | 45.35            | 29.61            | 33.07            | Website <sup>2-5</sup> |
| <sup>2</sup> Electricity price | USD kWh <sup>-1</sup> | 0.096            | 0.086            | 0.156            | 0.555            | 0.262            | 0.330            | 0.105            | Website <sup>6</sup>   |
| Processing cost [Base]         | USD kWh <sup>-1</sup> | 77.2             | 66.8             | 115.0            | 350.0            | 184.6            | 215.1            | 90.4             | Own calculation        |
| Processing cost [Deep SUGAR]   |                       | 9.7              | 7.7              | 12.4             | 24.1             | 18.3             | 16.6             | 13.0             |                        |

<sup>1</sup>Hourly labor cost per employee for manufacturing field

<sup>2</sup>Average electricity price in 2021 (December) and 2022 (September) in business sector

<sup>a</sup>KOR: Republic of Korea

<sup>b</sup>CHN: China

<sup>c</sup>USA: United States of America

<sup>d</sup>DEU: Germany

<sup>e</sup>FRA: France

<sup>f</sup>GBR: United Kingdom

<sup>g</sup>CAN: Canada

**Supplementary Table 29. Parameters used in economic and carbon footprint analysis.**

| Indicator                      | Base  | Unit                                    |
|--------------------------------|-------|-----------------------------------------|
| Annual operating hours         | 8,000 | h                                       |
| Number of pack cycle tester    | 10    | -                                       |
| Installation period            | 1     | y                                       |
| Discount rate                  | 10    | %                                       |
| BoP cost ratio                 | 10    | %                                       |
| Maintenance cost               | 1     | %                                       |
| <sup>1</sup> Electricity price | 0.096 | USD kWh <sup>-1</sup>                   |
| <sup>2</sup> Carbon intensity  | 0.475 | kgCO <sub>2</sub> -eq kWh <sup>-1</sup> |

<sup>1</sup>Average electricity price in the Republic of Korea from 2021 December to 2022 September in business sector<sup>7</sup>.

<sup>2</sup>Average carbon intensity in the Republic of Korea from 2000 to 2019<sup>8</sup>.



**Supplementary Table 30. Parameters used in sensitivity analysis.**

| <b>Parameter</b>                         | <b>Minimum</b> | <b>Base</b> | <b>Maximum</b> | <b>Unit</b>           |
|------------------------------------------|----------------|-------------|----------------|-----------------------|
| <b>Number of cycle testers</b>           | 1              | 10          | 20             | -                     |
| <b>Energy efficiency of cycle tester</b> | 80.0           | 85.0        | 90.0           | %                     |
| <b>14S7P cycle tester cost</b>           | 58,100         | 83,000      | 107,900        | USD                   |
| <b>7P cycle tester cost</b>              | 32,900         | 47,000      | 61,100         | USD                   |
| <b>Hourly labor cost</b>                 | 8.16           | 16.32       | 24.48          | USD h <sup>-1</sup>   |
| <b>Electricity price</b>                 | 0.05           | 0.10        | 0.14           | USD kWh <sup>-1</sup> |
| <b>Discount rate</b>                     | 7.5            | 10.0        | 12.5           | %                     |

## Nomenclature

|       |                            |
|-------|----------------------------|
| SoH   | State-of-Health            |
| GPR   | Gaussian Process Regressor |
| DT    | Decision Tree              |
| CAPEX | Capital expenditure        |
| OPEX  | Operating expenditure      |
| KOR   | Republic of Korea          |
| CHN   | China                      |
| USA   | United States of America   |
| DEU   | Germany                    |
| FRA   | France                     |
| GBR   | United Kingdom             |
| CAN   | Canada                     |

## References

1. G. V. Fabian Pedregosa, Alexandre Gramfort, Vincent Michel, Bertrand Thirion, Olivier Grisel, Mathieu Blondel, Peter Prettenhofer, Ron Weiss, Vincent Dubourg, Jake Vanderplas, Alexandre Passos, David Cournapeau, Matthieu Brucher, Matthieu Perrot, Édouard Duchesnay, *Scikit-learn: Machine Learning in Python*, JMLR, 2011.
2. Hourly labor cost in manufacturing in KOR, <http://datakorea.datastore.or.kr/profile/industry/C/>, (accessed May 1<sup>st</sup>, 2023).
3. KOR, <http://datakorea.datastore.or.kr/profile/industry/C/>, (accessed May 1<sup>st</sup>, 2023).
4. CHN, DEU, FRA, GBR, CAN, <https://ilostat.ilo.org/topics/labour-costs/>, (accessed May 1<sup>st</sup>, 2023).
5. USA, <https://tradingeconomics.com/united-states/wages-in-manufacturing>, (accessed May 1<sup>st</sup>, 2023).
6. Electricity price, [https://www.globalpetrolprices.com/electricity\\_prices/](https://www.globalpetrolprices.com/electricity_prices/), (accessed May 1<sup>st</sup>, 2023).
7. electricity price of KOR, [https://www.globalpetrolprices.com/electricity\\_prices/](https://www.globalpetrolprices.com/electricity_prices/), (accessed May 1<sup>st</sup>, 2023).
8. Carbon intensity of KOR, <https://ourworldindata.org/grapher/carbon-intensity-electricity?time=2000>, (accessed May 1<sup>st</sup>, 2023).
